# Supplementary material
Source: PubMed Central journal article supplement (PMC3488952)
Supplement: CJN.11301111_CJN11301111SupplementaryData.pdf [file CJN.11301111_CJN11301111SupplementaryData.pdf]

Francis B. Gabbai, M.D.; VA San Diego Healthcare System and Department of Medicine, University of California San Diego.

Mahboob Rahman, M.D.; Department of Medicine, Case Western University

Bo Hu, PhD.; Department of Quantitative Health Sciences, Cleveland Clinic Foundation

Lawrence J. Appel, M.D., M.P.H.; Welch Center for Prevention, Epidemiology and Clinical Research, Johns Hopkins Medical Institutions.

Jeanne Charleston, RN.; Johns Hopkins ProHealth, Johns Hopkins Medical Institutions

Gabriel Contreras, M.D., M.P.H.; Department of Medicine, University of Miami Miller School of Medicine

Marquetta L. Faulkner, M.D.; Meharry Medical College

Leena Hiremath, PhD.; Division of Nephrology, Ohio State University Medical Center

Kenneth A. Jamerson, M.D.; Division of Cardiovascular Medicine, University of Michigan.

Janice Lea, M.D.; Emory Center for Hypertension and Renal Disease Research, Emory University School of Medicine

Michael S. Lipkowitz, M.D.; Department of Nephrology and Hypertension, Georgetown University Medical center

Velvie A. Pogue, M.D.; Department of Medicine, Harlem Hospital and Columbia University (retired 2011)

Stephen G. Rostand, M.D.; Division of Nephrology, University of Alabama at Birmingham

Miroslaw J. Smogorzewski, M.D.; Division of Nephrology, University of Southern California Keck School of Medicine

Jackson T. Wright, M.D, PhD.; Department of Medicine, Case Western University

Tom Greene, PhD.; Division of Clinical Epidemiology, University of Utah School of Medicine

Jennifer Gassman, PhD.; Department of Quantitative Health Sciences, Cleveland Clinic Foundation

Xuelei Wang, M.S.; Department of Quantitative Health Sciences, Cleveland Clinic Foundation

Robert A. Phillips, M.D.; Cardiovascular Research Foundation, University of Massachusetts Medical School
